# Supplementary material
Source: Springer Nature journal article supplement (https://www.springermedizin.de/resource/supplementary/12974_2011_411_MOESM2_ESM.pdf/9601238)

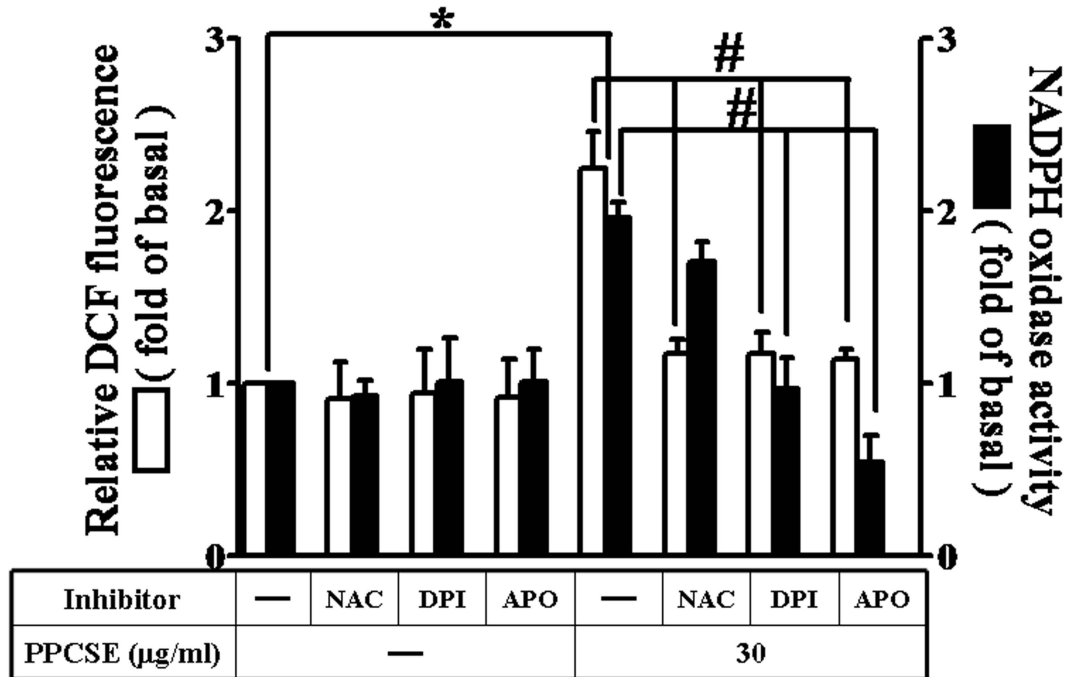

**B.**

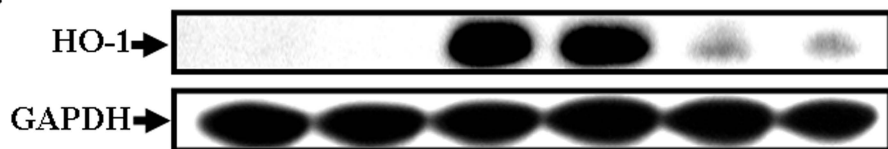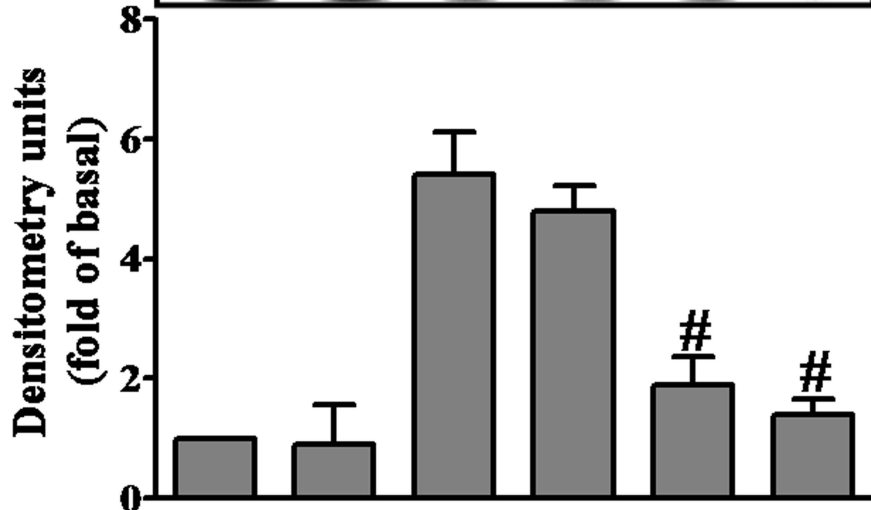

| APO (µM)      | — | 1 | —  | 0.01 | 0.1 | 1 |
|---------------|---|---|----|------|-----|---|
| PPCSE (µg/ml) | — |   | 30 |      |     |   |

Supplement: MOESM2 [file 9601238]
